# Supplementary material
Source: MDPI journal article supplement (https://www.mdpi.com/2076-3298/11/3/58)
Supplement: s1 [file s1]

**Table S1.** Nominal and analytical concentrations of acute test samples and the relative standard deviations. Concentrations are expressed in mg/L.

|                  | <b>Ce</b>      |                   | <b>Gd</b>      |                   |
|------------------|----------------|-------------------|----------------|-------------------|
|                  | <b>Nominal</b> | <b>Analytical</b> | <b>Nominal</b> | <b>Analytical</b> |
| 3 days exposure  | 0.00           | 0.00              | 0.00           | 0.00              |
|                  | 1.20           | 0.87 ± 0.04       | 1.20           | 0.93 ± 0.07       |
|                  | 2.50           | 2.56 ± 0.11       | 2.50           | 2.16 ± 0.13       |
|                  | 5.00           | 5.18 ± 0.15       | 5.00           | 4.28 ± 0.24       |
|                  | 9.00           | 6.90 ± 0.20       | 10.00          | 8.70 ± 0.48       |
|                  | 10.00          | 10.31 ± 0.30      | 12.50          | 12.70 ± 0.70      |
|                  | 15.00          | 15.96 ± 0.46      | 15.00          | 15.63 ± 0.86      |
|                  | -              | -                 | 17.50          | 17.31 ± 0.95      |
| 28 days exposure | 2.52           | 2.395 ± 0.104     | 4.75           | 4.527 ± 0.272     |
|                  | 3.36           | 3.139 ± 0.136     | 6.53           | 6.021 ± 0.361     |
